# Supplementary material
Source: PubMed Central journal article supplement (PMC5741333)

## Legends to Supplementary Figures:

### **Supplementary Figure 1. *Time-course of locally administrated DAMGO on postoperative anti-hypersensitivity in adult and aged mice***

Incision-induced thermal (A, C) and mechanical (B, D) hypersensitivity were generated in adult (A, B) and aged (C, D) mice. At 1 day (for adults) and 1-3 days (for aged) post-surgery, operated hindpaws were injected with different dosages of DAMGO, and thermal (A, C) and mechanical (B, D) hypersensitivity were measured at 30, 60 (for some dosages) and 120 min post-DAMGO injection. Significance of DAMGO produced anti-hypersensitivity was compared against postoperative hypersensitivity reading (marked POP; 1-way ANOVA; \*\*  $p < 0.01$ ; \*\*\* $p < 0.001$ ;  $n = 5-8$ ). Post-drug administration time points are indicated below X-axis. BL is pre-surgery baseline reading. Opioid dosages and mouse ages are indicated.

### **Supplementary Figure 2. *Time-course of spinally administrated DAMGO on postoperative anti-hypersensitivity in adult and aged mice***

Incision-induced thermal (A, C) and mechanical (B, D) hypersensitivity were generated in adult (A, B) and aged (C, D) mice. At 1 day (for adults) and 1-3 days (for aged) post-surgery, different dosages of DAMGO were administered intrathecally, and thermal (A, C) and mechanical (B, D) hypersensitivity were measured at 30 and 120 min post-DAMGO injection. Significance of DAMGO produced anti-hypersensitivity was compared against postoperative hypersensitivity reading (marked POP). For thermal anti-hypersensitivity, statistics showed  $p < 0.001$  for all time points and DAMGO dosages (1-way ANOVA;  $n = 5-8$ ). Post-drug administration time points are indicated below X-axis. Opioid dosages and mouse ages are indicated.

**Supplementary Figure 3. *Time-course of locally administrated buprenorphine on postoperative anti-hypersensitivity in adult and aged mice***

Incision-induced thermal (**A, C**) and mechanical (**B, D**) hypersensitivity were generated in adult and aged mice. At 1 day (for adults) and 1-3 days (for aged) post-surgery, operated hindpaws were injected with different dosages of buprenorphine, and thermal (**A, C**) and mechanical (**B, D**) hypersensitivity were measured at 30 and 120 min post-buprenorphine injection. Significance of buprenorphine produced anti-hypersensitivity was compared against hypersensitivity reading (marked POP; 1-way ANOVA; NS – non-significant; \*\*\*  $p < 0.001$ ;  $n = 5-8$ ). Post-drug administration time points are indicated below X-axis. BL indicates the baseline pre-surgery reading. Opioid dosages and mouse ages are indicated.

**Supplementary Figure 4. *Time-course of locally administrated buprenorphine on postoperative anti-hypersensitivity in adult and aged mice***

Incision-induced thermal (**A, C**) and mechanical (**B, D**) hypersensitivity were generated in adult and aged mice. At 1 day (for adults) and 1-3 days (for aged) post-surgery, different dosages of buprenorphine were intrathecally administrated, and thermal (**A, C**) and mechanical (**B, D**) hypersensitivity were evaluated at 30 and 120 min post-buprenorphine injection. Significance of buprenorphine produced anti-hypersensitivity was compared against hypersensitivity reading (marked POP; 1-way ANOVA; NS-non-significant; \*\* $p < 0.01$ ; \*\*\* $p < 0.001$ ; \*\*\*\* $p < 0.0001$ ;  $n = 5-8$ ). Post-drug administration time points are indicated below X-axis. Opioid dosages and mouse ages are indicated.

**Supplementary Figure 5. *Buprenorphine-induced locomotor activity in naive adult and aged mice***

Buprenorphine-induced locomotor activities were measured as number of breaks of horizontal infrared beams per 30-min period in naïve adult (**A**) and aged (**C**) mice ( $n = 4-6$  per age group).

Overall locomotor activity during 2 h exposure to the activity chambers showed on panels **(B)** for adult and **(D)** for aged mice. Locomotor activities were measured after spinal administration of saline or different dosages of buprenorphine. During the initial 2-h exposure, saline (Sal) was administrated; and then 72h later, during a second 2-h exposure, buprenorphine (Bup) was administrated. Data of both sessions were obtained in the same animals. Buprenorphine dosages are indicated. For panels **(B)** and **(D)**, statistic is 1-way ANOVA; \*  $p < 0.05$ .

2-6 month old

Suppl Fig 1

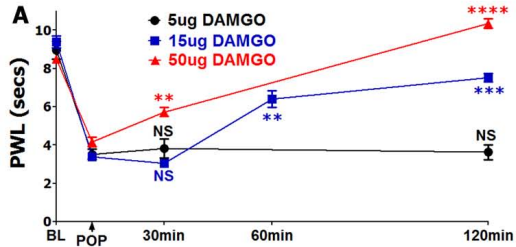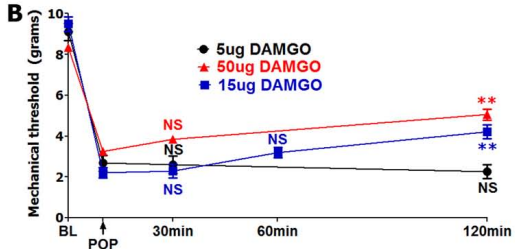

24 month old

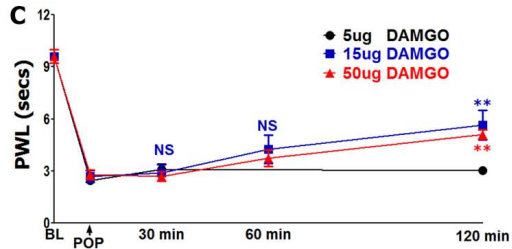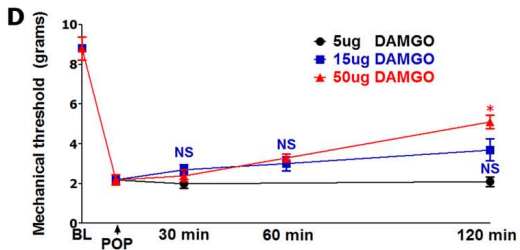

## Suppl Fig 2

## 2-6-month-old

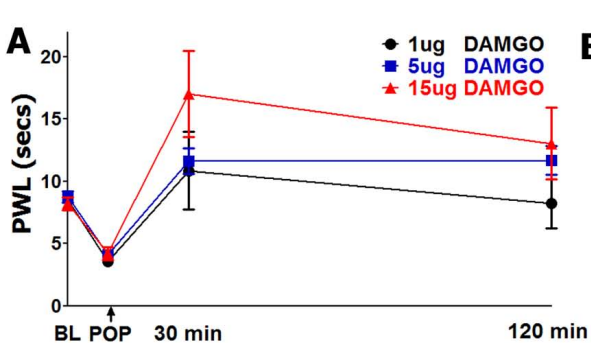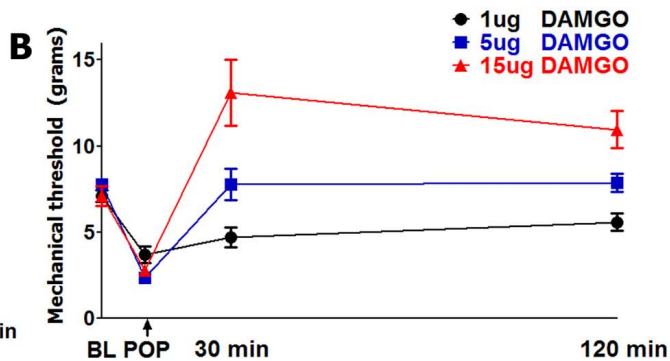

## 24-month-old

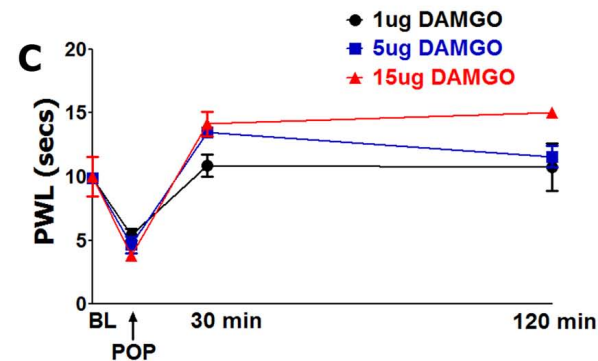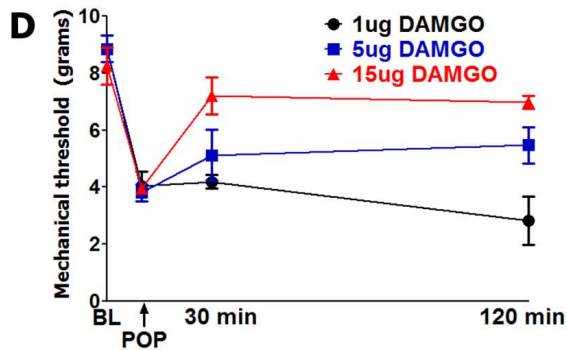

2-6 month-old

Suppl Fig 3

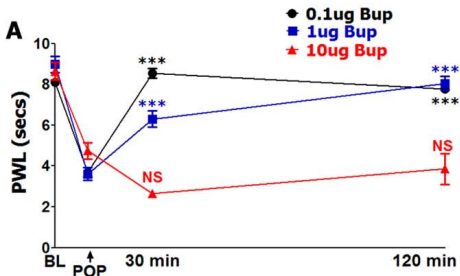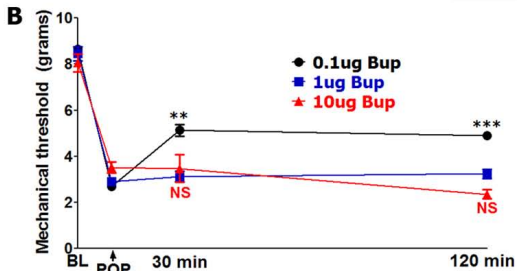

24 month-old

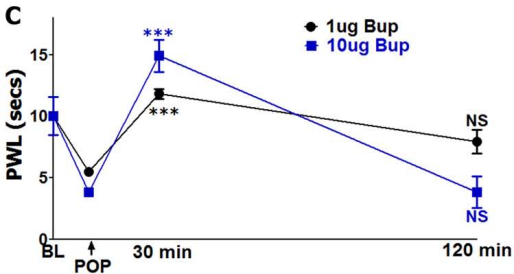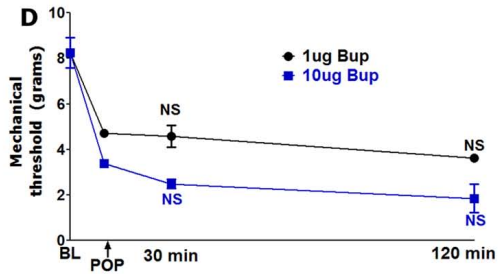

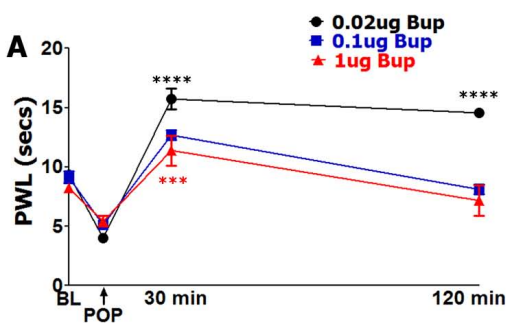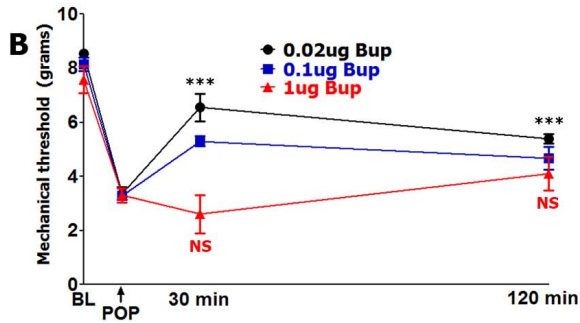

## 24-month-old

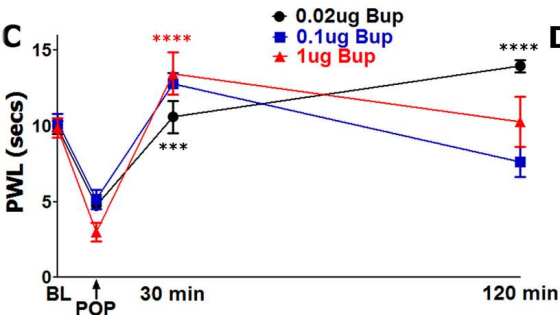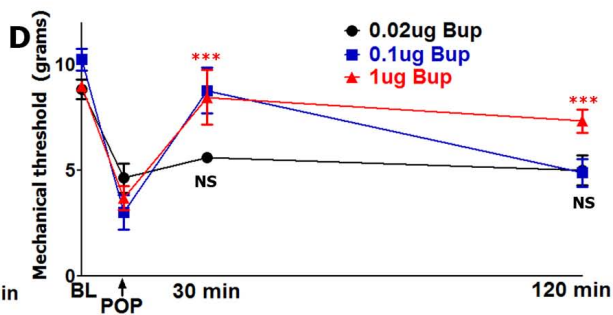

## 2-6-month-old

Suppl Fig 5

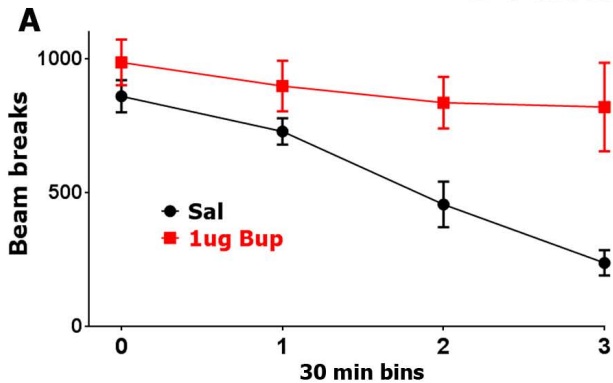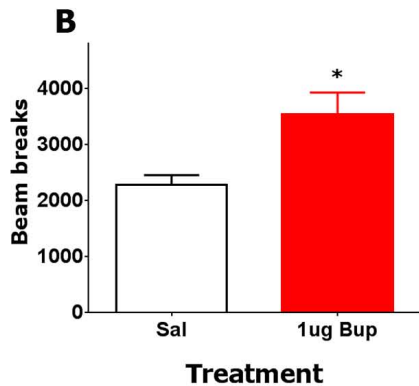

## 24-month-old

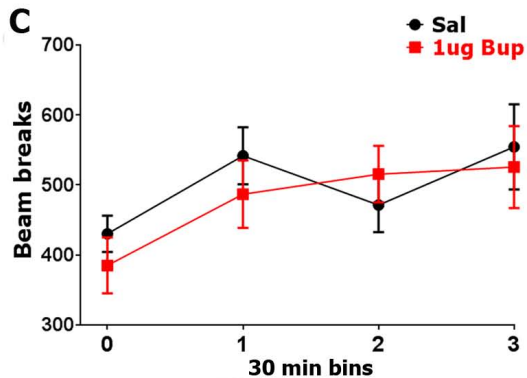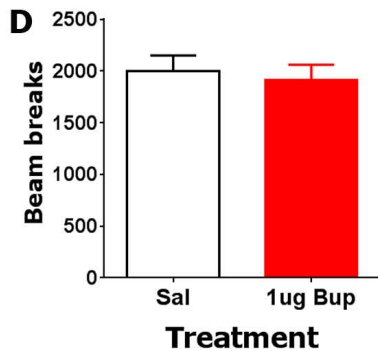

Supplement: painreports-2-e584-s001.pdf [file painreports-2-e584-s001.pdf]
